# Supplementary material
Source: ML conference proceedings conference paper supplement (https://aclanthology.org/2024.codi-1.6)
Supplement: SupplementaryMaterial [file DiscourseNetwork_complete.pdf › DiscourseNetwork_complete.pdf]

**actors**

**affiliation network**

**claims**

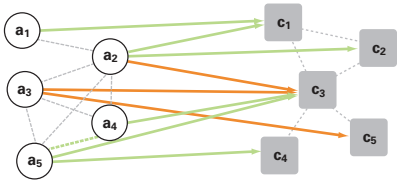

**actor network**  
(discourse coalition)

**concept network**  
(argumentative cluster)
